# Supplementary material for: A single-stranded coordination copolymer affords heterostructure observation and photoluminescence intensification
Source: PubMed Central journal article supplement — Sci Adv. 2019 Jan 4;5(1):eaau0637. doi: 10.1126/sciadv.aau0637 (PMC6314875; doi:10.1126/sciadv.aau0637), 2019-01-04
Supplement: aau0637_SM.pdf [file aau0637_SM.pdf]

## Supplementary Materials for

### A single-stranded coordination copolymer affords heterostructure observation and photoluminescence intensification

Ryojun Toyoda, Ryota Sakamoto\*, Naoya Fukui, Ryota Matsuoka, Mizuho Tsuchiya, Hiroshi Nishihara

\*Corresponding author. Email: sakamoto@chem.s.u-tokyo.ac.jp.

Published 4 January 2019, *Sci. Adv.* **5**, eaau0637 (2019)

DOI: 10.1126/sciadv.aau0637

#### This PDF file includes:

- Fig. S1. Oak Ridge thermal ellipsoid plot drawings of  $H_2L3 \cdot 2HBr$  and  $H_2L3' \cdot 2HBr \cdot (\text{solvent})_n$  with a thermal ellipsoid set at the 50% probability level.
- Fig. S2. XPS for proligands and coordination polymers.
- Fig. S3. Quantification of the elemental ratio from XPS.
- Fig. S4. Elemental abundances in Co-1-*k* and Homo-1 determined by elemental and ICP-AES analysis.
- Fig. S5. PL enhancement mechanism for a heteroleptic complex.
- Fig. S6. UV/vis spectroscopy for Co-2-*k* in toluene.
- Fig. S7. Photovoltaic conversion of Co-1-6, Homo-3, and Homo-1.
- Fig. S8. Three-electrode electrochemical cell used for the photoelectric conversion.
- Fig. S9. AFM images of Co-1-3 on other substrates.
- Fig. S10. AFM for Homo-1.
- Fig. S11. AFM for Homo-3'.
- Fig. S12. Gaussian fitting of AFM height histograms of Co-1-*k*, Homo-1, and Homo-3'.
- Fig. S13. PL lifetimes ( $\tau_{PL}$ ) in toluene.
- Fig. S14. PL of Co-2-*k* in toluene.
- Fig. S15. PL quantum yield dependence on *x*' in toluene.
- Fig. S16. Calculated  $\phi_{PL}$  dependence on *x*.
- Fig. S17. UV/vis absorption spectroscopy for copolymers and corresponding mononuclear complexes in toluene.
- Table S1. Crystallographic data.
- Table S2. PL properties of Co-1-*k*, Homo-1, and Homo-3 in toluene.

## Supplementary Materials

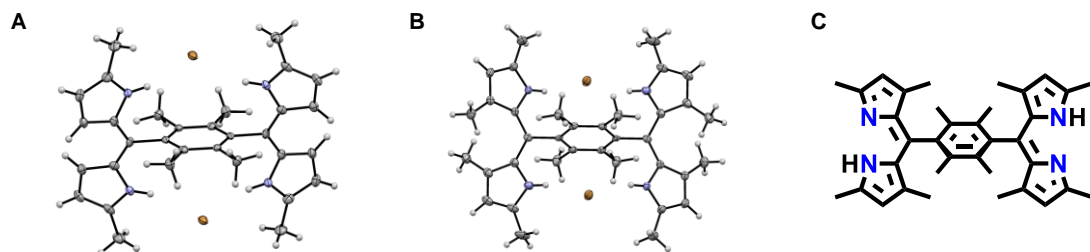

**Fig. S1.** Oak Ridge thermal ellipsoid plot drawings of  $\text{H}_2\text{L3}\cdot 2\text{HBr}$  and  $\text{H}_2\text{L3}'\cdot 2\text{HBr}\cdot(\text{solvent})_n$  with a thermal ellipsoid set at the 50% probability level. Gray: carbon; white: hydrogen; blue: nitrogen; orange: bromine. (C) Molecular structure of  $\text{H}_2\text{L3}'$ .

**Table S1. Crystallographic data.**(A) H<sub>2</sub>L3·2HBr

|                                                |                                                                |
|------------------------------------------------|----------------------------------------------------------------|
| Empirical Formula                              | C <sub>32</sub> H <sub>36</sub> Br <sub>2</sub> N <sub>4</sub> |
| Formula Weight / g mol <sup>-1</sup>           | 636.47                                                         |
| Temperature / K                                | 93                                                             |
| $\lambda$ / Å                                  | 0.71075                                                        |
| Crystal System                                 | triclinic                                                      |
| Space Group                                    | P-1                                                            |
| $a$ / Å                                        | 7.793(3)                                                       |
| $b$ / Å                                        | 9.875(4)                                                       |
| $c$ / Å                                        | 19.350(8)                                                      |
| $\alpha$ / °                                   | 86.845(11)                                                     |
| $\beta$ / °                                    | 87.523(13)                                                     |
| $\gamma$ / °                                   | 78.9714(10)                                                    |
| $V$ / Å <sup>3</sup>                           | 1458.6(10)                                                     |
| $Z$                                            | 2                                                              |
| $d_{\text{calcd}}$ / g cm <sup>-3</sup>        | 1.449                                                          |
| $\mu$ (MoK $\alpha$ ) / mm <sup>-1</sup>       | 2.815                                                          |
| $F(000)$                                       | 652.00                                                         |
| Crystal size / mm <sup>3</sup>                 | 0.300×0.300×0.300                                              |
| Theta range for data collection                | 3.10 to 27.50 °                                                |
| Index ranges                                   | -8≤ $h$ ≤9, -11≤ $k$ ≤11, -22≤ $l$ ≤21                         |
| Reflections collected                          | 9001                                                           |
| Independent reflections                        | 4619 ( $R_{\text{int}} = 0.0368$ )                             |
| Data completeness                              | 98.2 %                                                         |
| Max. and min. transmission                     | 0.340 and 0.430                                                |
| Refinement method                              | Full-matrix least-squares on $F^2$                             |
| Data / restraints / parameters                 | 4619/ 0 / 343                                                  |
| <sup>a</sup> Goodness-of-Fit on $F^2$          | 1.096                                                          |
| <sup>b</sup> $R_1$ [ $I > 2.00\sigma(I)$ ]     | 0.0431                                                         |
| <sup>c</sup> $wR_2$ (all reflections)          | 0.1005                                                         |
| Largest diff. peak and hole / eÅ <sup>-3</sup> | 0.53 and -0.43                                                 |

(B) H<sub>2</sub>L3'·2HBr·(Solvent)<sub>n</sub>

|                                                |                                                                |
|------------------------------------------------|----------------------------------------------------------------|
| Empirical Formula                              | C <sub>36</sub> H <sub>44</sub> Br <sub>2</sub> N <sub>4</sub> |
| Formula Weight / g mol <sup>-1</sup>           | 692.58                                                         |
| Temperature / K                                | 93                                                             |
| $\lambda$ / Å                                  | 0.71073                                                        |
| Crystal System                                 | monoclinic                                                     |
| Space Group                                    | P2 <sub>1</sub> /n                                             |
| $a$ / Å                                        | 9.9254(4)                                                      |
| $b$ / Å                                        | 12.8066(5)                                                     |
| $c$ / Å                                        | 14.3031(7)                                                     |
| $\alpha$ / °                                   | 90.0000                                                        |
| $\beta$ / °                                    | 105.514(5)                                                     |
| $\gamma$ / °                                   | 90.0000                                                        |
| $V$ / Å <sup>3</sup>                           | 1751.83(14)                                                    |
| $Z$                                            | 4                                                              |
| $d_{\text{calcd}}$ / g cm <sup>-3</sup>        | 2.626                                                          |
| $\mu$ (MoK $\alpha$ ) / mm <sup>-1</sup>       | 4.699                                                          |
| $F$ (000)                                      | 1432.00                                                        |
| Crystal size / mm <sup>3</sup>                 | 0.300×0.300×0.300                                              |
| Theta range for data collection                | 2.95 to 31.28 °                                                |
| Index ranges                                   | -12≤ $h$ ≤12, -14≤ $k$ ≤16, -18≤ $l$ ≤18                       |
| Reflections collected                          | 13928                                                          |
| Independent reflections                        | 4014 ( $R_{\text{int}} = 0.0439$ )                             |
| Data completeness                              | 99.9 %                                                         |
| Max. and min. transmission                     | 0.782 and 1.000                                                |
| Refinement method                              | Full-matrix least-squares on $F^2$                             |
| Data / restraints / parameters                 | 4014/ 0 / 190                                                  |
| <sup>a</sup> Goodness-of-Fit on $F^2$          | 1.042                                                          |
| <sup>b</sup> $R_1$ [ $I > 2.00\sigma(I)$ ]     | 0.0394                                                         |
| <sup>c</sup> $wR_2$ (all reflections)          | 0.0908                                                         |
| Largest diff. peak and hole / eÅ <sup>-3</sup> | 0.41 and -0.36                                                 |

The contribution of solvent electron density was removed by the SQUEEZE function.

$$^a \text{GOF} = [\sum(w(F_o^2 - F_c^2)^2 / \sum(N_r - N_p)^2)]. \quad ^b R_1 = \sum||F_o| - |F_c|| / \sum|F_o| \quad (I > 2 \sigma(I)).$$

$$^c wR_2 = [\sum(w(F_o^2 - F_c^2)^2 / \sum w(F_o^2)^2)]^{1/2} \quad (I > 2 \sigma(I)).$$

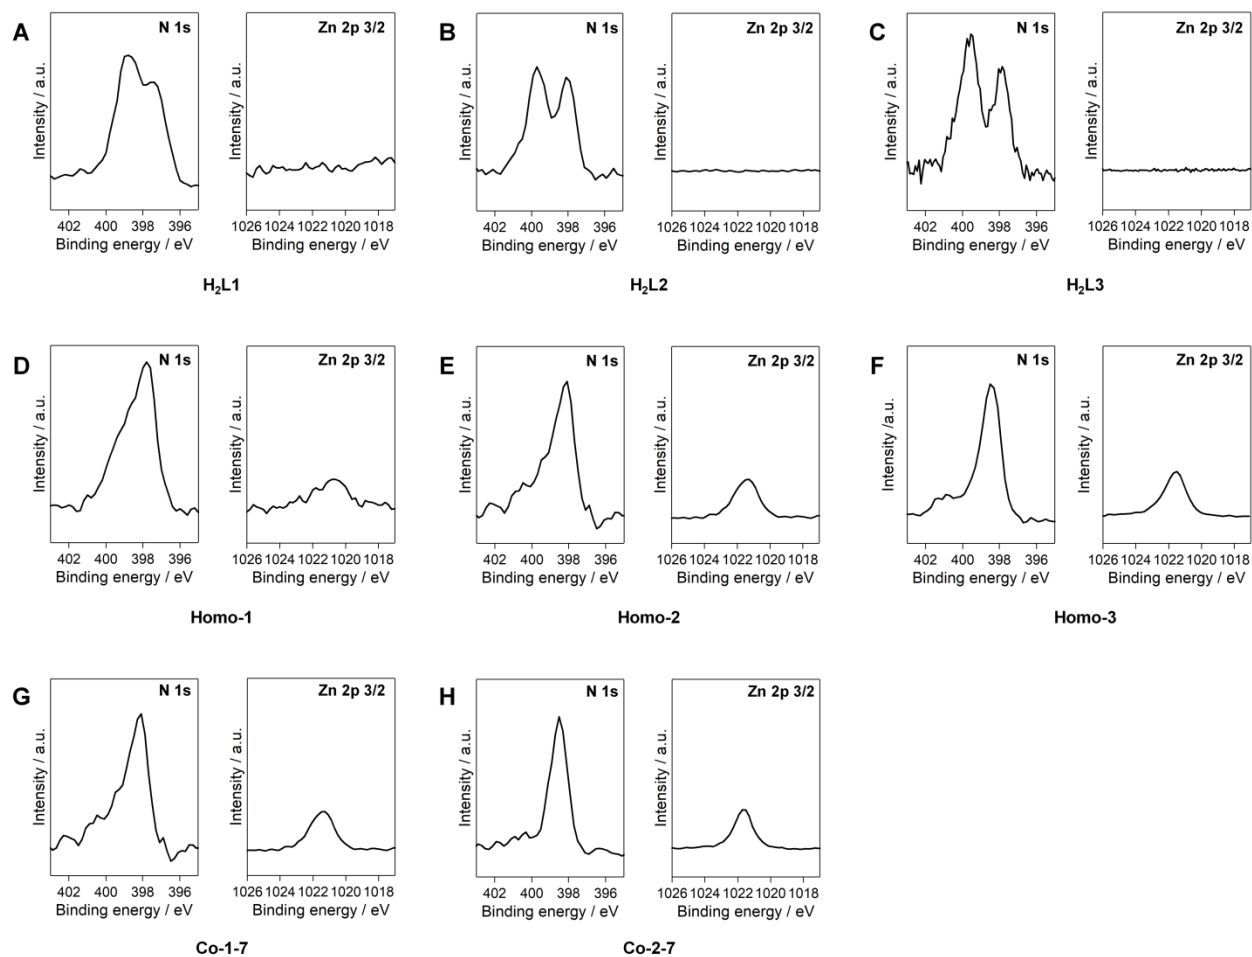

**Fig. S2. XPS for proligands and coordination polymers. (A) H<sub>2</sub>L1. (B) H<sub>2</sub>L2. (C) H<sub>2</sub>L3. (D) Homo-1. (E) Homo-2. (F) Homo-3. (G) Co-1-7. (H) Co-2-7. The intensity of the signal is standardized using the photoionization cross-section of each element.**

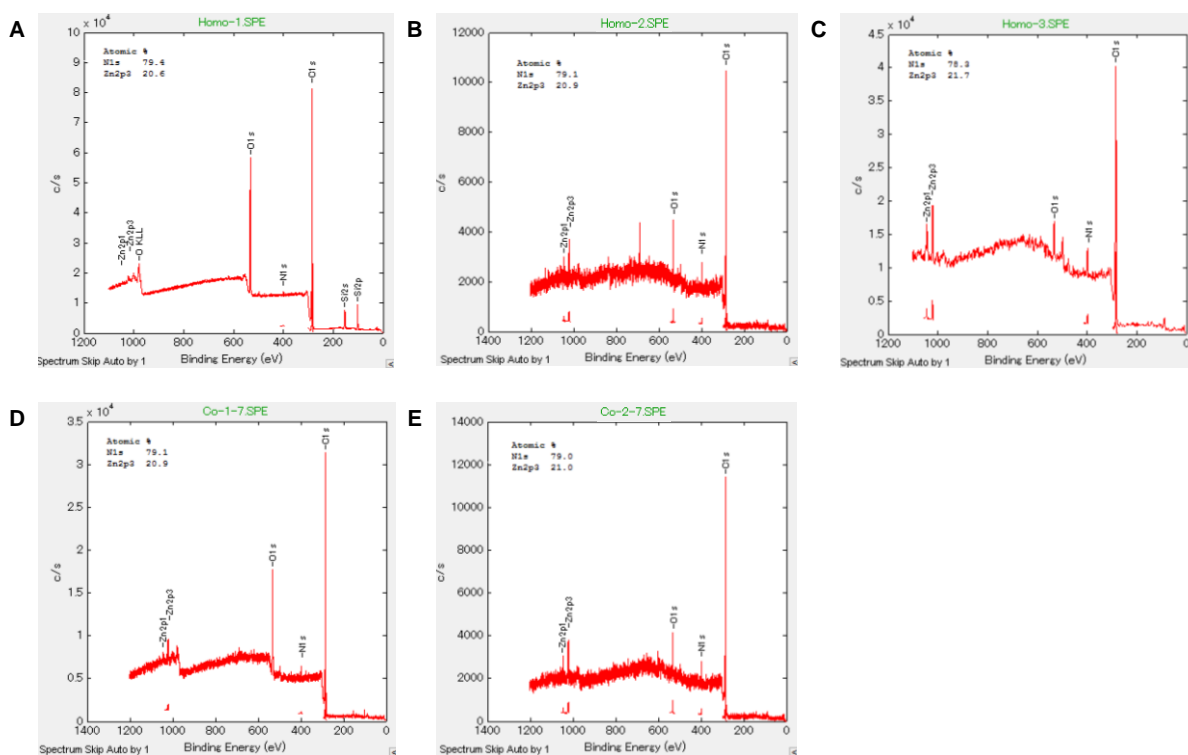

**Fig. S3. Quantification of the elemental ratio from XPS. (A) Homo-1. (B) Homo-2. (C) Homo-3. (D) Co-1-7. (E) Co-2-7.**

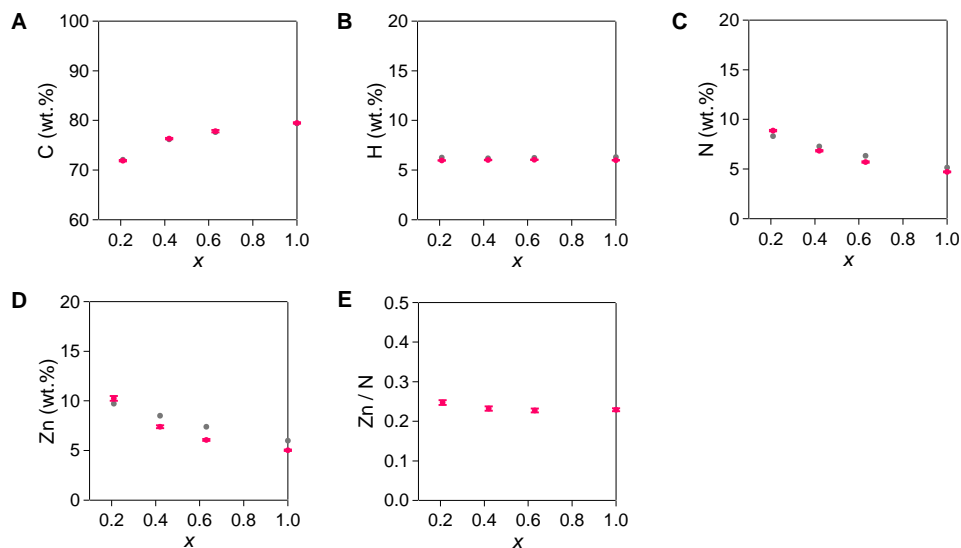

**Fig. S4. Elemental abundances in Co-1- $k$  and Homo-1 determined by elemental and ICP-AES analysis. (A) carbon; (B) hydrogen; (C) nitrogen; (D) zinc. (E) Zn/N- $x$  plot. As an admixture, water molecules were added; 2.12, 1.53, 0.87 and 1.31 molecules per zinc center were added to **Homo-1**, **Co-1- $k$**  with  $x = 0.21, 0.42,$  and  $0.63,$  respectively. Gray: calculated; magenta: experimental.**

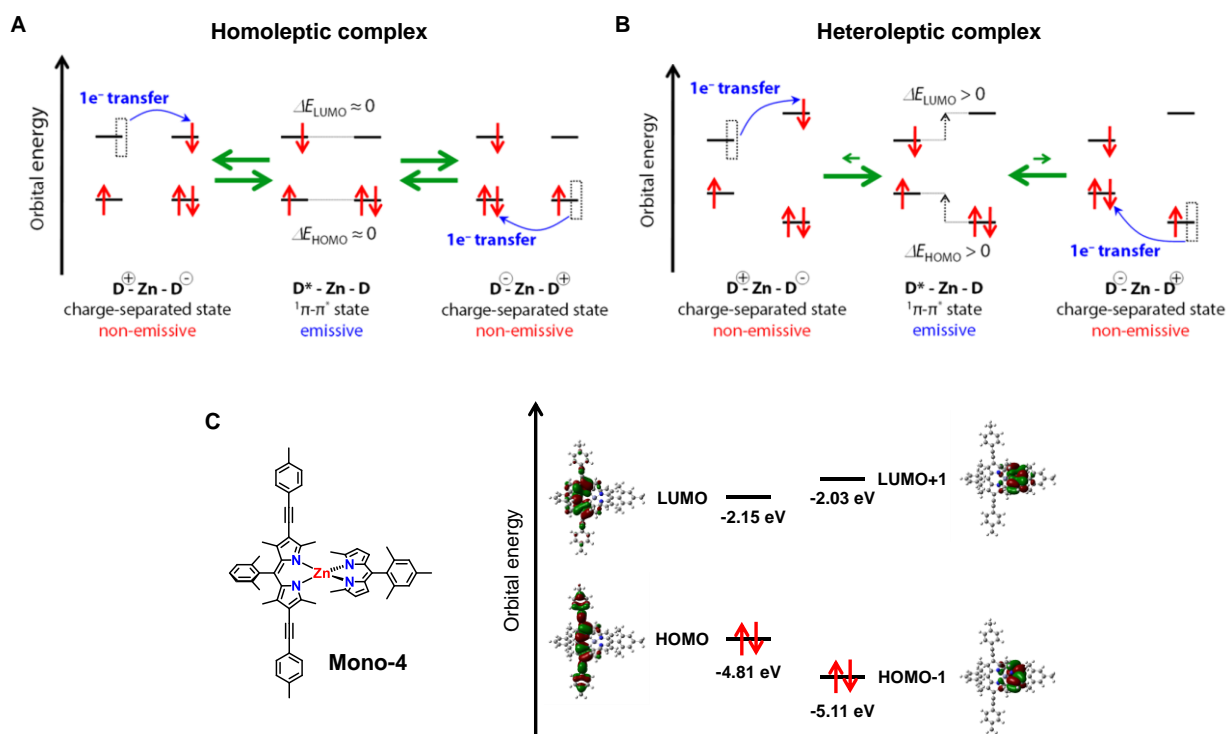

**Fig. S5. PL enhancement mechanism for a heteroleptic complex.** (A,B) Schematic illustrations of plausible thermal equilibria among the two non-emissive symmetry-breaking charge-separated states and the emissive  $^1\pi-\pi^*$  excited state localized on the left-hand dipyrinato ligand in the case of (A) homoleptic complex; (B) heteroleptic complex. (C) Chemical structure and molecular orbitals of **Mono-4** with DFT/B3LYP/6-31G(d).

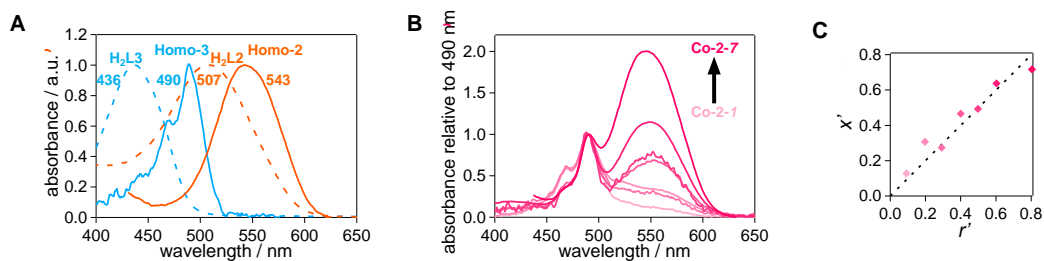

**Fig. S6. UV/vis spectroscopy for Co-2-*k* in toluene.** (A) Normalized UV/vis spectra of bridging dipyrin proligands **H<sub>2</sub>L<sub>2</sub>** and **H<sub>2</sub>L<sub>3</sub>**, and homopolymers **Homo-2** and **Homo-3**. (B) UV/vis spectra of **Co-2-*k*** ( $k = 1-7$ ) normalized at 490 nm. (C) Relationship between the mole fraction of **L<sub>2</sub>** in **Co-2-*k*** ( $x'$ ) and mixing ratio of **H<sub>2</sub>L<sub>2</sub>** to (**H<sub>2</sub>L<sub>2</sub>** + **H<sub>2</sub>L<sub>3</sub>**) ( $r'$ ).

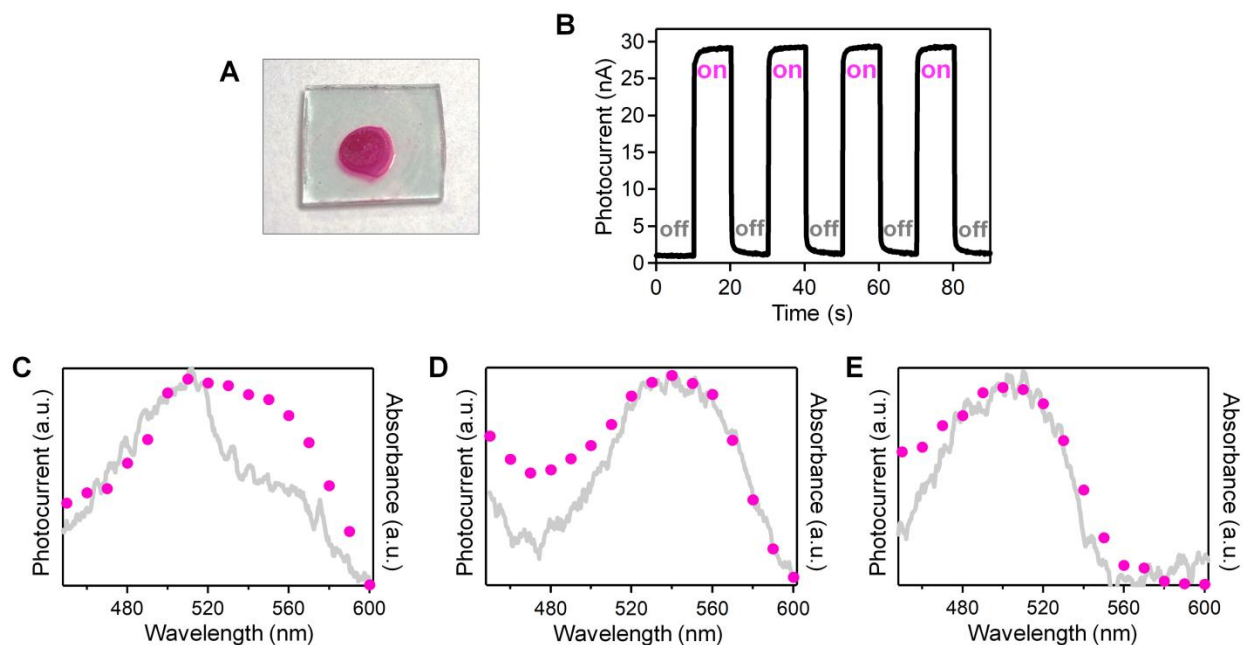

**Fig. S7. Photovoltaic conversion of Co-1-6, Homo-3, and Homo-1.** (A) Photograph of a thin film of **Co-1-6** on a SnO<sub>2</sub> substrate. (B) Anodic photocurrent response of **Co-1-6** on irradiation of an electrode with intermittent 500 nm light (Light intensity: 3.56 mW). (C) Action spectrum for the photocurrent generation and absorption spectrum of **Co-1-6** on a SnO<sub>2</sub> substrate. (D) Action spectrum for the photocurrent generation and absorption spectrum of **Homo-3** on a SnO<sub>2</sub> substrate. (E) Action spectrum for the photocurrent generation and absorption spectrum of **Homo-1** on a SnO<sub>2</sub> substrate.

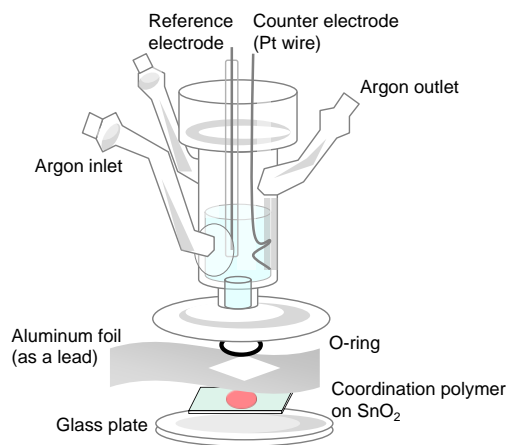

**Fig. S8. Three-electrode electrochemical cell used for the photoelectric conversion.** The incident light was illuminated from the bottom of the cell.



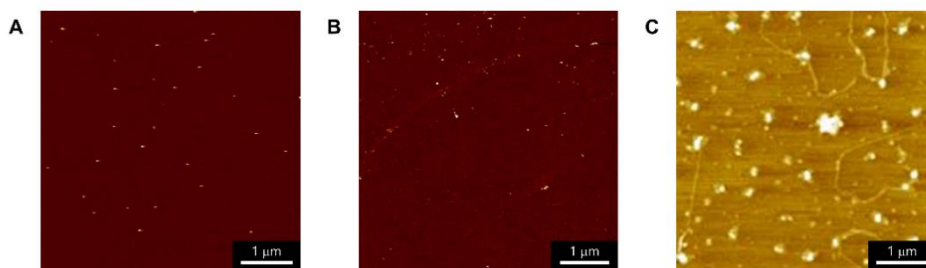

**Fig. S9. AFM images of Co-1-3 on other substrates. (A)** On mica. **(B)** On SiO<sub>2</sub>/Si(100). **(C)** On MoS<sub>2</sub>. Among those, only MoS<sub>2</sub> visualized the exfoliated **Co-1-3**.

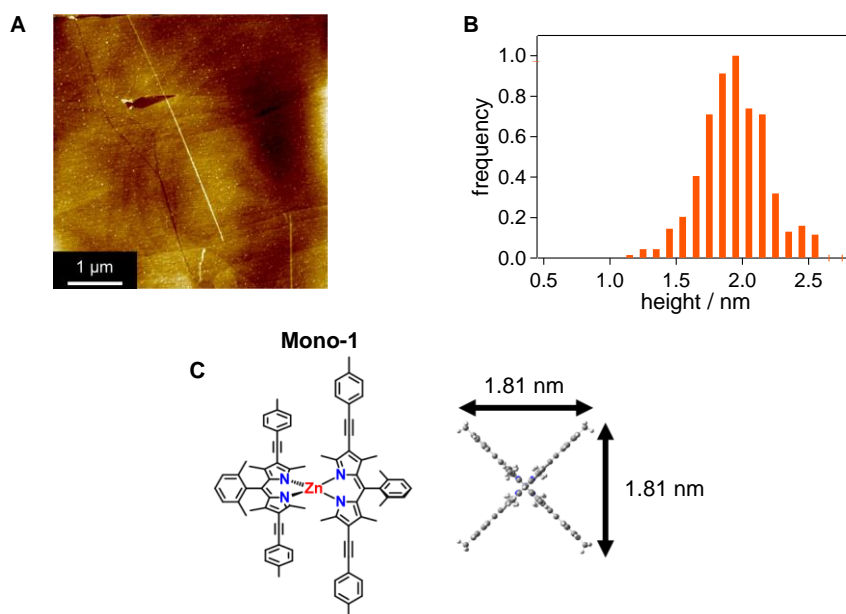

**Fig. S10. AFM for Homo-1. (A)** Representative AFM height image for **Homo-1**. **(B)** Height histogram. **(C)** Chemical structure of corresponding mononuclear complex **Mono-1**, with a size estimated by DFT calculation.

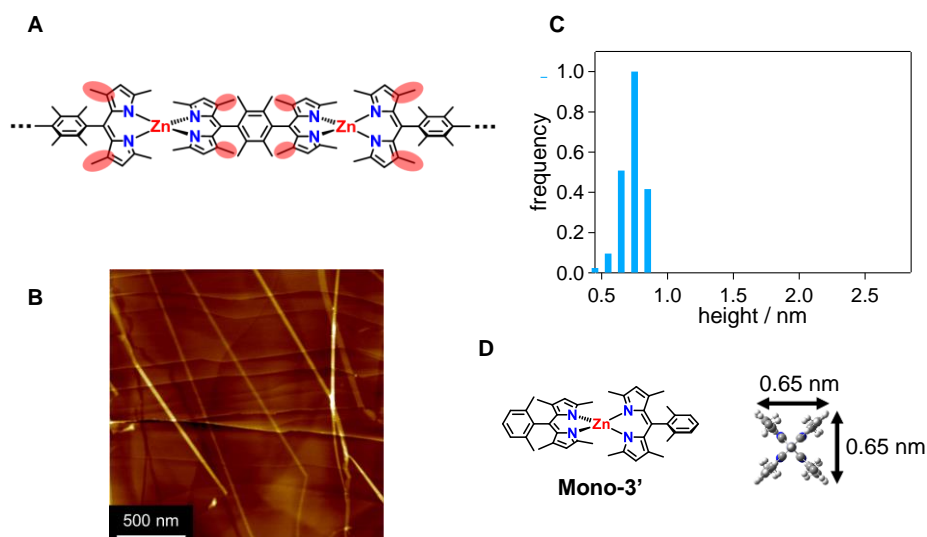

**Fig. S11. AFM for *Homo-3'*.** (A) Molecular structure of *Homo-3'*. The difference between *Homo-3* lies in additional methyl groups shown in red. The lower dispersibility of *Homo-3* hampered the AFM analysis, which prompted us to use *Homo-3'* as an alternative. The additional methyl group is unlikely to alter the height of the single strand observed in AFM. (B) Representative AFM height image for *Homo-3'*. (C) Height histogram. (D) Chemical structure of corresponding mononuclear complex *Mono-3''*, with a size estimated by DFT calculation.

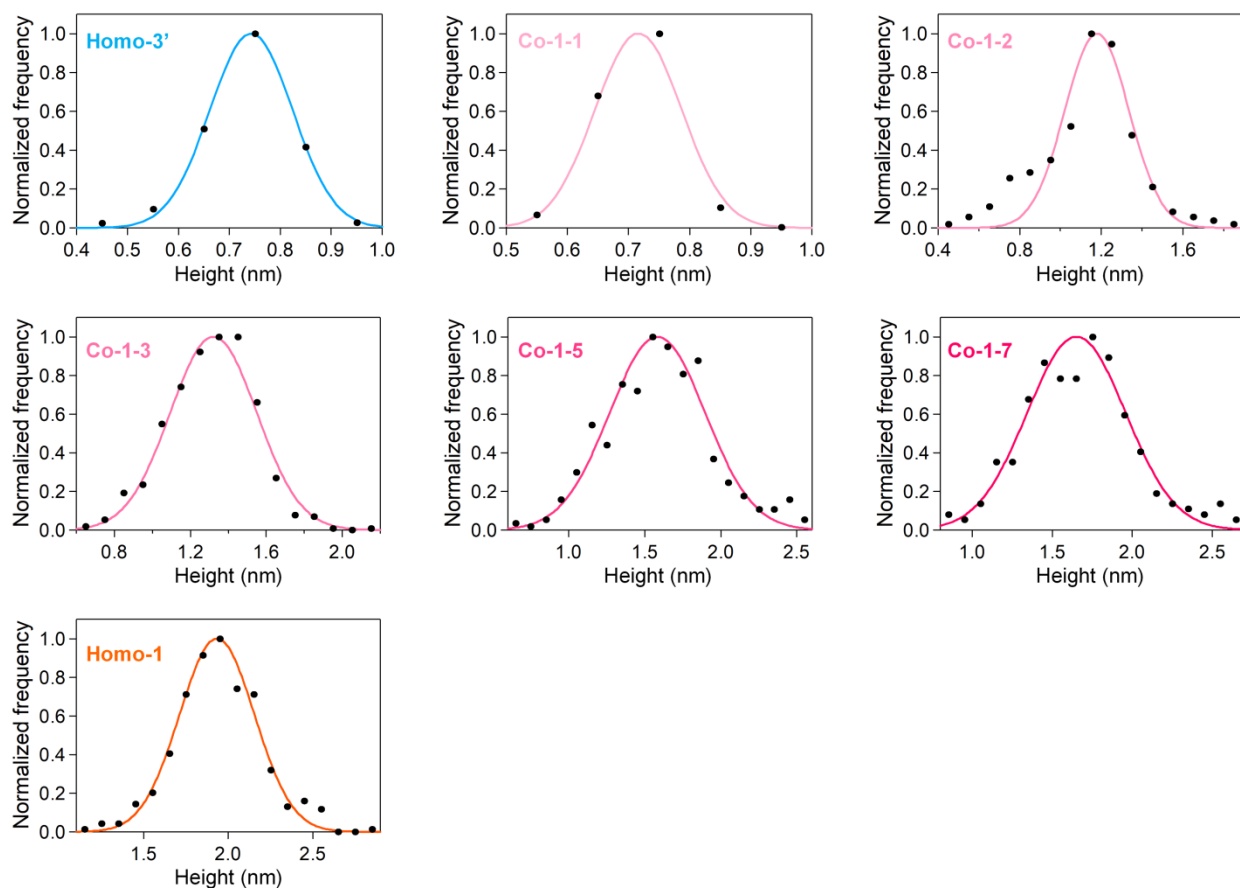

**Fig. S12. Gaussian fitting of AFM height histograms of *Co-1-k*, *Homo-1*, and *Homo-3'*.**

**Table S2. PL properties of Co-1-*k*, Homo-1, and Homo-3 in toluene.**

| Sample        | $\phi_{\text{PL}}$ (excited at 550 nm) | $\phi_{\text{PL}}$ (excited at 490 nm) | $\tau_{\text{PL}}$ /ns |
|---------------|----------------------------------------|----------------------------------------|------------------------|
| <b>Co-1-1</b> | 0.32                                   | 0.21                                   | 2.89 <sup>a)</sup>     |
| <b>Co-1-2</b> | 0.24                                   | 0.23                                   | 2.72 <sup>a)</sup>     |
| <b>Co-1-3</b> | 0.25                                   | 0.25                                   | 2.66 <sup>a)</sup>     |
| <b>Co-1-4</b> | 0.15                                   | 0.15                                   | 2.46 <sup>a)</sup>     |
| <b>Co-1-5</b> | 0.12                                   | 0.12                                   | 2.16 <sup>a)</sup>     |
| <b>Co-1-6</b> | 0.11                                   | 0.11                                   | 2.08 <sup>a)</sup>     |
| <b>Co-1-7</b> | 0.06                                   | 0.06                                   | 1.61 <sup>a)</sup>     |
| <b>Homo-1</b> | 0.03                                   | N/A                                    | N/A <sup>b)</sup>      |
| <b>Homo-3</b> | N/A                                    | 0.10                                   | 3.79 <sup>a)</sup>     |

<sup>a)</sup> measured at excitation with 470 nm. <sup>b)</sup> not measured due to low absorption at 470 nm.

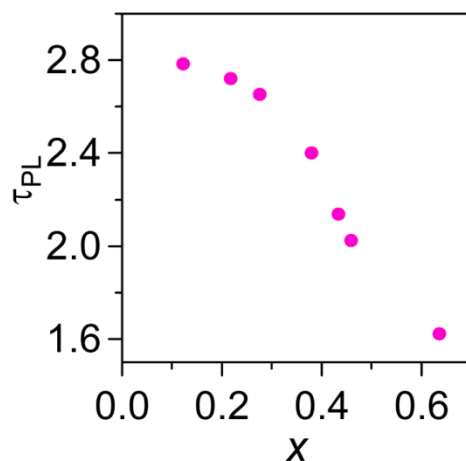

**Fig. S13. PL lifetimes ( $\tau_{\text{PL}}$ ) in toluene.**  $\tau_{\text{PL}}$  – mole ratio of ligand L1 (*x*) plots. PL lifetime of Co-1-*k* was measured in toluene with an incident light of 470 nm. The PL decay was fitted with a single-exponential decay.

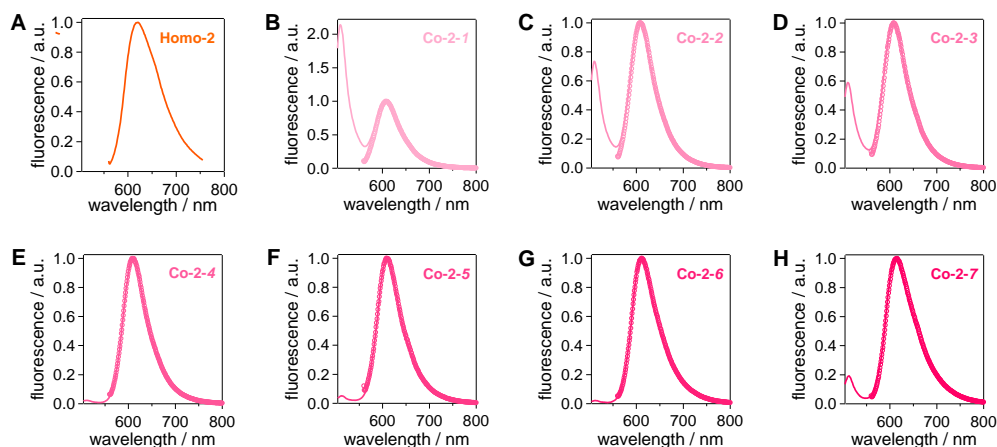

**Fig. S14. PL of Co-2-*k* in toluene.** PL spectra of (A) Homo-2 excited at 550 nm. (B–H) Co-2-*k* (*k* = 1–7) excited at 490 (solid line) and 550 nm (circle).

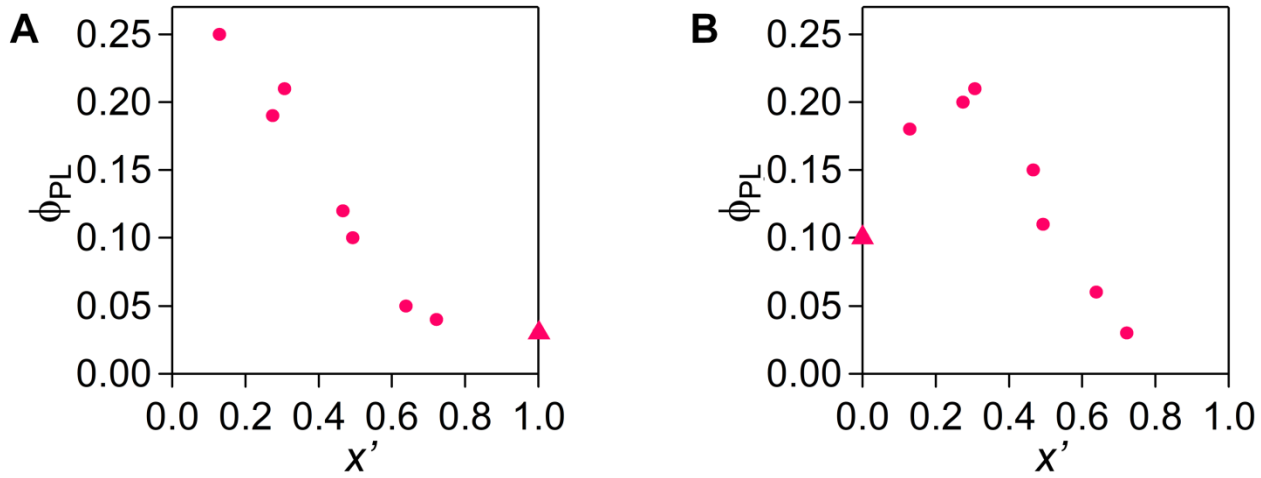

**Fig. S15. PL quantum yield dependence on  $x'$  in toluene.** (A,B)  $\phi_{\text{PL}} - x'$  plots for coordination copolymers **Co-2- $k$**  ( $k = 1-7$ ; circles) and homopolymers **Homo-2** and **Homo-3** (triangles) excited at (A) 550 nm; (B) 490 nm.

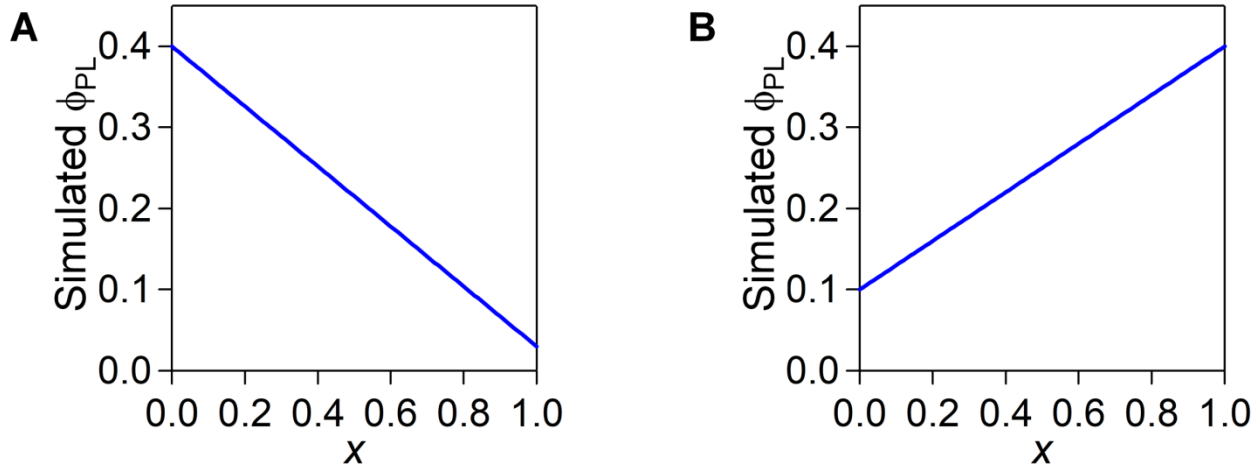

**Fig. S16. Calculated  $\phi_{\text{PL}}$  dependence on  $x$ .** (A) When excited at 550 nm; (B) When excited at 490 nm. Herein, intrawire exciton hopping is not considered. For 550 nm illumination,  $\mathbf{D}_{\text{Homo-L1}}$  or  $\mathbf{D}_{\text{Hetero-L1}}$  is photoexcited, the distribution ratio of which is  $x : (1 - x)$ . Therefore, the simulated  $\phi_{\text{PL}} = \phi(\mathbf{D}_{\text{Homo-L1}}) x + \phi(\mathbf{D}_{\text{Hetero-L1}}) (1 - x)$ , where  $\phi(\mathbf{D}_{\text{Homo-L1}})$  and  $\phi(\mathbf{D}_{\text{Hetero-L1}})$  denote the probabilities of PL emission from  $\mathbf{D}_{\text{Homo-L1}}$  and  $\mathbf{D}_{\text{Hetero-L1}}$ . For 490 nm illumination,  $\mathbf{D}_{\text{Homo-L3}}$  or  $\mathbf{D}_{\text{Hetero-L3}}$  is photoexcited, the distribution ratio of which is  $(1 - x) : x$ . Therefore, the simulated  $\phi_{\text{PL}} = \phi(\mathbf{D}_{\text{Homo-L3}}) (1 - x) + \phi(\mathbf{D}_{\text{Hetero-L3}}) x$ , where  $\phi(\mathbf{D}_{\text{Homo-L3}})$  and  $\phi(\mathbf{D}_{\text{Hetero-L3}})$  denote the probabilities of PL emission from  $\mathbf{D}_{\text{Homo-L3}}$  and  $\mathbf{D}_{\text{Hetero-L3}}$ .  $\phi(\mathbf{D}_{\text{Homo-L3}}) = 0.10$ ;  $\phi(\mathbf{D}_{\text{Homo-L1}}) = 0.03$ ;  $\phi(\mathbf{D}_{\text{Hetero-L3}}) = \phi(\mathbf{D}_{\text{Hetero-L1}}) = 0.40$ , the same value used in the numerical simulation shown in Fig. 6C.

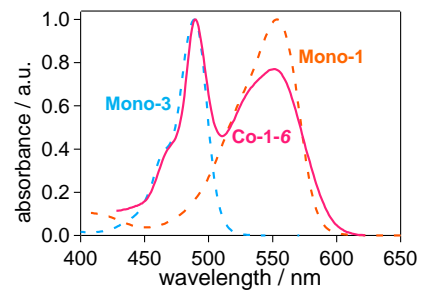

**Fig. S17. UV/vis absorption spectroscopy for copolymers and corresponding mononuclear complexes in toluene.** UV/vis spectra of **Co-1-6** (solid line), **Mono-1** (dotted line, orange) and **Mono-3** (dotted, blue).
